# Supplementary material
Source: publisher figshare collection journal article supplement (https://sage.figshare.com/ndownloader/files/20150828)
Supplement: Supplementary file 1 [file 20150828]

# CUTESY CUES CARRY CITATION CONSEQUENCES

## Online Appendix

Table A

*Communication Journals from which Articles were Extracted*

| National Communication Association Journals                                                |                                                                                              |
|--------------------------------------------------------------------------------------------|----------------------------------------------------------------------------------------------|
| Communication & Critical/Cultural Studies                                                  | Communication Education                                                                      |
| Communication Monographs<br>(formerly Speech Monographs)                                   | Critical Studies in Media Communication<br>(formerly Critical Studies in Mass Communication) |
| First Amendment Studies*<br>(formerly Free Speech Yearbook)                                | Journal of Applied Communication Research                                                    |
| Journal of International & Intercultural Communication                                     | Quarterly Journal of Speech                                                                  |
| Text and Performance Quarterly<br>(formerly Literature and Performance)                    |                                                                                              |
| International Communication Association Journals                                           |                                                                                              |
| Annals of the International Communication Association<br>(formerly Communication Yearbook) | Journal of Computer-Mediated Communication                                                   |
| Communication Theory                                                                       | Human Communication Research                                                                 |
| Journal of Communication                                                                   | Communication, Culture, & Critique                                                           |
| Regional Communication Association Journals                                                |                                                                                              |
| Communication Quarterly<br>(formerly Today's Speech)                                       | Communication Studies<br>(formerly Central States Speech Journal)                            |
| Communication Research Reports                                                             | Communication Reports                                                                        |
| Qualitative Research Reports in Communication                                              | Southern Communication Journal<br>(formerly Southern States Speech Journal)                  |
| Western Journal of Communication (formerly Western Journal of Speech Communication)        |                                                                                              |

*Note:* \*Articles published in First Amendment Studies published prior to 1996 were not able to be acquired.

## CUTESY CUES CARRY CITATION CONSEQUENCES

Table B

*Descriptions, Examples, and Alpha Coefficients for Coded Title Characteristics*

| Stylistic Cue               | $\alpha^1$ | Description                                                                                                                                                     | Examples from Data                                                                                                     |
|-----------------------------|------------|-----------------------------------------------------------------------------------------------------------------------------------------------------------------|------------------------------------------------------------------------------------------------------------------------|
| Metaphor                    | .85        | The title incorporates a figure of speech in which an object or action is described in a way that is not literally applicable                                   | "The web of shyness: A network analysis of communicative correlates"                                                   |
| Sarcasm                     | .79        | The title implies mockery or contempt for a person or idea, potentially through the use of verbal irony                                                         | "A kinder, gentler discipline: Feeling good about being mediocre"                                                      |
| Alliteration                | 1.00       | The language in the title contains stylistic, rather than incidental or technical, alliteration in which a sequence of words has the same first consonant sound | "Revivalists, reverends, and raconteurs: Studies in contemporary preaching"                                            |
| Idiom/Cliché                | 1.00       | The title incorporates a phrase or expression that has a figure meaning which is deducible only from the combination of words used                              | "Two birds with one stone: Training communication specialists while teaching medical students"                         |
| Simile                      | 1.00       | The title incorporates a figure of speech that makes a comparison between two distinct things in order to more vividly describe one of them                     | "The president as God, the recession as evil: Actus, status, and the president's rhetorical bind in the 1992 election" |
| Famous Quote: Movie or Play | 100%       | A quote in the title contains an original or modified line from a movie or play                                                                                 | "'...And by opposing, end them.' The genre of moral justification for legal transgressions."                           |
| Famous Quote: Public Figure | 1.00       | A quote in the title contains an original or modified quote from a well-known public figure, such as a politician, coach, or scientist                          | "Copyright notices in traditional and new media journals: Lies, damned lies, and copyright notices"                    |

## CUTESY CUES CARRY CITATION CONSEQUENCES

Table B, cont'd

| Stylistic Cue                          | $\alpha$ | Description                                                                                                                                                   | Examples from Data                                                                                                                                       |
|----------------------------------------|----------|---------------------------------------------------------------------------------------------------------------------------------------------------------------|----------------------------------------------------------------------------------------------------------------------------------------------------------|
| Famous Quote:<br>Lyric                 | 1.00     | A quote in the title contains an original or modified song lyric                                                                                              | “What's love got to do with it?<br>Exploring the impact of maintenance rules, love attitudes, and network support on friends with benefits relationship” |
| Double<br>Entendre                     | 100%     | The title incorporates a figure of speech that can be understood as having at least two meanings, one of which is often risqué                                | None observed in the data                                                                                                                                |
| Onomatopoeia                           | 100%     | The title contains language that imitates a sound                                                                                                             | None observed in the data                                                                                                                                |
| Order:<br>Main Title<br>Stylistic Cues | .78      | In cases in which there is a separating punctuation mark and stylistic content, indicates whether the stylistic content appears in the main title or subtitle | Main: “Of mighty mice and meek men: Contextual reconstruction of the Iranian airbus shutdown”                                                            |
| Subtitle<br>Stylistic Cues             |          |                                                                                                                                                               | Subtitle: “The rhetoric of Roe v. Wade: When the (male) doctor knows best”                                                                               |
| General<br>Characteristic              | $\alpha$ | Description                                                                                                                                                   | Examples from Data                                                                                                                                       |
| Separating<br>Punctuation:             |          | A punctuation mark is used to separate the main title from the subtitle                                                                                       | Question Mark: “Does television news about UFOs affect viewers' UFO beliefs? An experimental investigation”                                              |
| Colon                                  | 1.00     |                                                                                                                                                               |                                                                                                                                                          |
| Question Mark                          | 1.00     |                                                                                                                                                               |                                                                                                                                                          |
| Exclamation                            | 100%     |                                                                                                                                                               | Exclamation: “Knowledge workers of the world! Unite?”                                                                                                    |
| Period                                 | 1.00     |                                                                                                                                                               |                                                                                                                                                          |
| Em Dash                                | 100%     |                                                                                                                                                               | Em Dash: “Sparky Candide—A Behavioral scientist's view (with apologies to Voltaire and Buber)”                                                           |

## CUTESY CUES CARRY CITATION CONSEQUENCES

Table B, cont'd

| General Characteristic | $\alpha$ | Description                                                                                                                     | Examples from Data                                                                                                                         |
|------------------------|----------|---------------------------------------------------------------------------------------------------------------------------------|--------------------------------------------------------------------------------------------------------------------------------------------|
| Proper Name            | .92      | The title includes a proper name (e.g., person, place, organization)                                                            | "J. Edgar Hoover's four baggers: An analysis of rhetorical functions"                                                                      |
| Results Preview        | .84      | The title specifically indicates that a bivariate or multivariate relationship was observed in the article                      | "The effects of nonverbal behavior on outcomes of compliance gaining attempts"                                                             |
| Question               | 1.00     | The title contains any form of question                                                                                         | "Receiver apprehension and listening comprehension: A linear or curvilinear relationship?"                                                 |
| Quotations             | .85      | Quotation marks are used to express the words of others in the title                                                            | "'You're my parent but you're not': Dialectical tensions in stepchildren's perceptions about communicating with the nonresidential parent" |
| Theory                 | 1.00     | The title explicitly mentions a theory                                                                                          | "Speech accommodation theory: The first decade and beyond"                                                                                 |
| Model                  | 1.00     | The title explicitly mentions a model                                                                                           | "Expanding the persuasive arguments explanation of the polarity shift: A linear discrepancy model"                                         |
| Assertion              | 100%     | The title is a complete sentence in which an assertion is made (i.e., a noun and a verb form a grammatically correct statement) | "Lyndon Johnson redefines 'equal opportunity': The beginnings of Affirmative Action"                                                       |

*Note:* Except for stylistic cue "order," the table is ordered by title cue prevalence;

<sup>1</sup>Krippendorff's alpha coefficients are from the final subset of cases double-coded by raters; "100%" denotes instances where the coders reached 100% agreement but the computed alpha coefficient was 0 because the title characteristic was absent in every case

# CUTESY CUES CARRY CITATION CONSEQUENCES

Table C

*Statistical Results Related to Research Questions 2 and 3*

| Title<br>Characteristic | Research Question 2:<br>Changes over time | Research Question 3:<br>Differences across journals |
|-------------------------|-------------------------------------------|-----------------------------------------------------|
| Any Stylistic<br>Cue    | $r_{pb}(2398) = .13, p < .001$            | $\chi^2(2) = 5.06, p = .080, V = .05$               |
| Metaphor                | $r_{pb}(2398) = .10, p < .001$            | $\chi^2(2) = 1.94, p = .379, V = .03$               |
| Sarcasm                 | $r_{pb}(2398) = .10, p < .001$            | $\chi^2(2) = 2.70, p = .259, V = .03$               |
| Alliteration            | $r_{pb}(2398) = .03, p = .157$            | $\chi^2(2) = 2.87, p = .238, V = .03$               |
| Idiom/Cliché            | $r_{pb}(2398) = .04, p = .040$            | $\chi^2(2) = 3.49, p = .174, V = .04$               |
| Colon Use               | $r_{pb}(2397) = .17, p < .001$            | $\chi^2(2) = 10.87, p = .004, V = .07$              |
| Proper Names            | $r_{pb}(2397) = -.02, p = .268$           | $\chi^2(2) = 65.55, p < .001, V = .17$              |
| Results<br>Preview      | $r_{pb}(2398) = .10, p < .001$            | $\chi^2(2) = 33.72, p < .001, V = .12$              |
| Question                | $r_{pb}(2398) = .03, p = .204$            | $\chi^2(2) = 0.55, p = .759, V = .02$               |
| Quotations              | $r_{pb}(2395) = .02, p = .305$            | $\chi^2(2) = 5.39, p = .068, V = .05$               |

*Note:* The tests were only conducted when the cue was present in at least 2% of titles but in fewer than 98% of titles;  $r_{pb}$  are point-biserial correlations
